# Supplementary material
Source: PubMed Central journal article supplement (PMC3017179)
Supplement: 1014085108_pnas.1014085108_SI.pdf [file 1014085108_pnas.1014085108_SI.pdf]

# Supporting Information

Zhang et al. 10.1073/pnas.1014085108

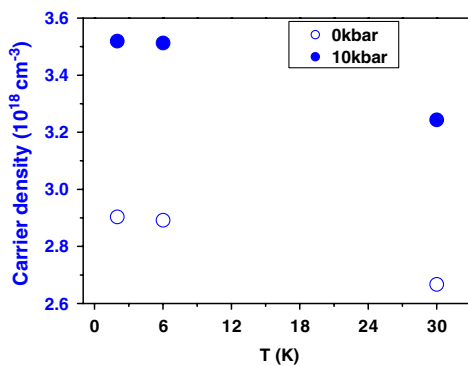

Fig. S1. The carrier density of Bi<sub>2</sub>Te<sub>3</sub> single crystal at ambient and 1.0 GPa, respectively, showing a slight increase with pressure.

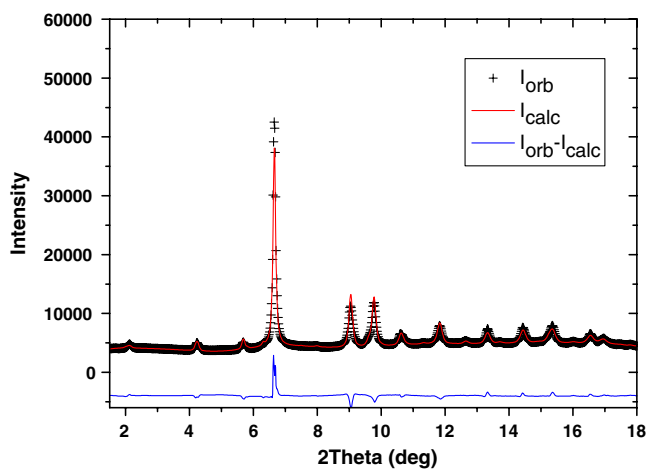

Fig. S2. The Rietveld refinements of the crystal structure for Bi<sub>2</sub>Te<sub>3</sub> at 4.0 GPa at room temperature. The cross and red line correspond to that for experiment and refinement, respectively, while the blue is the difference.
